# Supplementary material
Source: ML conference proceedings conference paper supplement (https://openaccess.thecvf.com/content/cvpr_2017/html/Kirillov_InstanceCut_From_Edges_2017_CVPR_paper.html)
Supplement: Supplementary file 1 [file Kirillov_InstanceCut_From_Edges_2017_CVPR_supplemental.pdf]

## Supplementary Materials for InstanceCut: from Edges to Instances with MultiCut

Alexander Kirillov<sup>1</sup> Evgeny Levinkov<sup>2</sup> Bjoern Andres<sup>2</sup> Bogdan Savchynskyy<sup>1</sup> Carsten Rother<sup>1</sup>

<sup>1</sup>TU Dresden, Dresden, Germany    <sup>2</sup>MPI for Informatics, Saarbrücken, Germany

<sup>1</sup>name.surname@tu-dresden.de    <sup>2</sup>surname@mpi-inf.mpg.de

In Table 2 we present a detailed performance comparison. Fig. 7 contains the subset of difficult scenes where InstanceCut is able to predict most instances correctly. Fig. 8 contains failure cases of InstanceCut. The main sources of failure are: small objects that are far away from the camera, groups of people that are very close to camera and have heavy mutual occlusions, and occluded instances that have several disconnected visible parts.

| Method            | Metric | Mean        | Person      | Rider       | Car         | Truck       | Bus         | Train       | Motorcycle  | Bicycle     |
|-------------------|--------|-------------|-------------|-------------|-------------|-------------|-------------|-------------|-------------|-------------|
| MCG+R-CNN [13]    | AP     | 4.6         | 1.3         | 0.6         | 10.5        | 6.1         | 9.7         | 5.9         | 1.7         | 0.5         |
| Uhrig et al. [48] | AP     | 8.9         | <b>12.5</b> | <b>11.7</b> | 22.5        | 3.3         | 5.9         | 3.2         | 6.9         | <b>5.1</b>  |
| InstanceCut       | AP     | <b>13.0</b> | 10.0        | 8.0         | <b>23.7</b> | <b>14.0</b> | <b>19.5</b> | <b>15.2</b> | <b>9.3</b>  | 4.7         |
| MCG+R-CNN [13]    | AP50%  | 12.9        | 5.6         | 3.9         | 26.0        | 13.8        | 26.3        | 15.8        | 8.6         | 3.1         |
| Uhrig et al. [48] | AP50%  | 21.1        | <b>31.8</b> | <b>33.8</b> | 37.8        | 7.6         | 12.0        | 8.5         | 20.5        | <b>17.2</b> |
| InstanceCut       | AP50%  | <b>27.9</b> | 28.0        | 26.8        | <b>44.8</b> | <b>22.2</b> | <b>30.4</b> | <b>30.1</b> | <b>25.1</b> | 15.7        |
| MCG+R-CNN [13]    | AP100m | 7.7         | 2.6         | 1.1         | 17.5        | 10.6        | 17.4        | 9.2         | 2.6         | 0.9         |
| Uhrig et al. [48] | AP100m | 15.3        | <b>24.4</b> | <b>20.3</b> | 36.4        | 5.5         | 10.6        | 5.2         | 10.5        | <b>9.2</b>  |
| InstanceCut       | AP100m | <b>22.1</b> | 19.7        | 14.0        | <b>38.9</b> | <b>24.8</b> | <b>34.4</b> | <b>23.1</b> | <b>13.7</b> | 8.0         |
| MCG+R-CNN [13]    | AP50m  | 10.3        | 2.7         | 1.1         | 21.2        | 14.0        | 25.2        | 14.2        | 2.7         | 1.0         |
| Uhrig et al. [48] | AP50m  | 16.7        | <b>25.0</b> | <b>21.0</b> | 40.7        | 6.7         | 13.5        | 6.4         | 11.2        | <b>9.3</b>  |
| InstanceCut       | AP50m  | <b>26.1</b> | 20.1        | 14.6        | <b>42.5</b> | <b>32.3</b> | <b>44.7</b> | <b>31.7</b> | <b>14.3</b> | 8.2         |

Table 2: CityScapes results. Instance-aware semantic segmentation results on the test set of CityScapes, given for each semantic class.

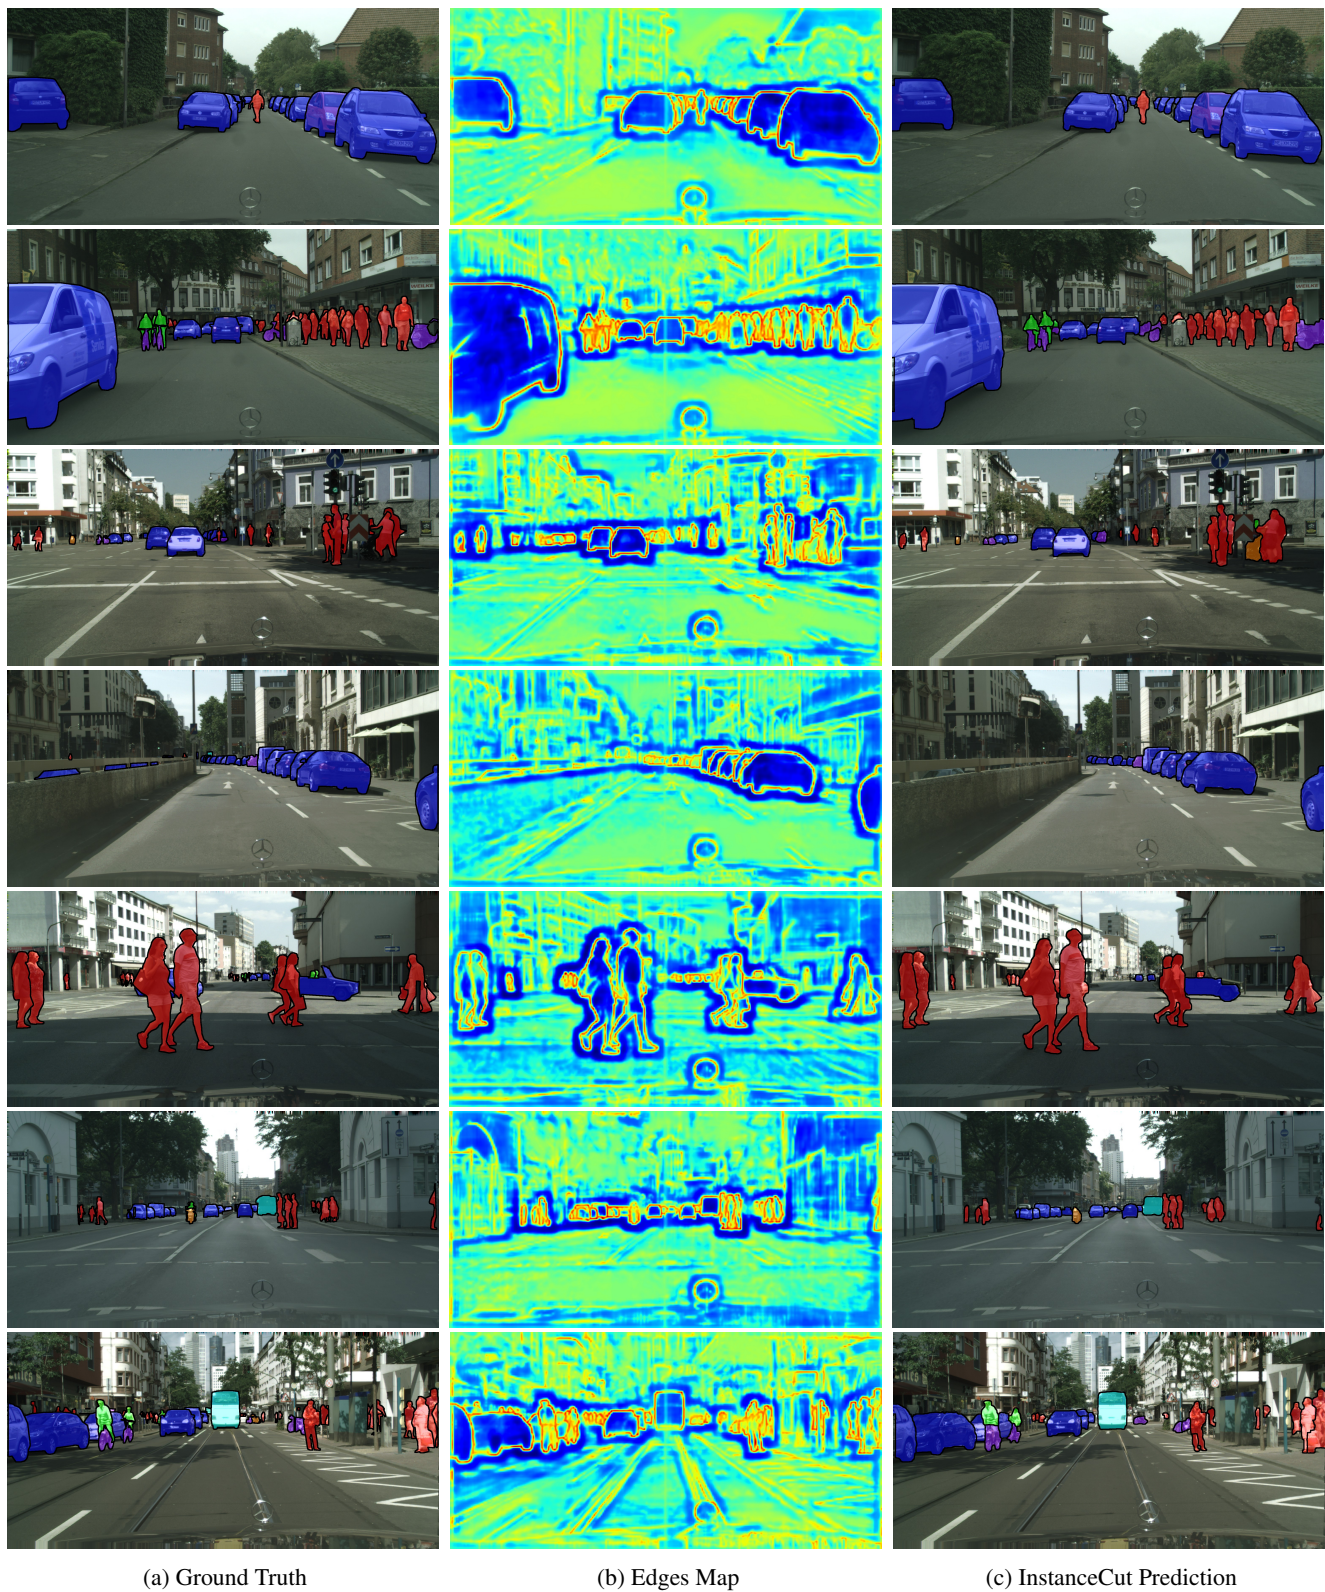

Figure 7: Curated difficult scene, where InstanceCut performs well. The left column contains input images with ground truth instances highlighted. The middle column depicts per-pixel instance-aware edge log-probabilities and the last column shows the results of our approach.



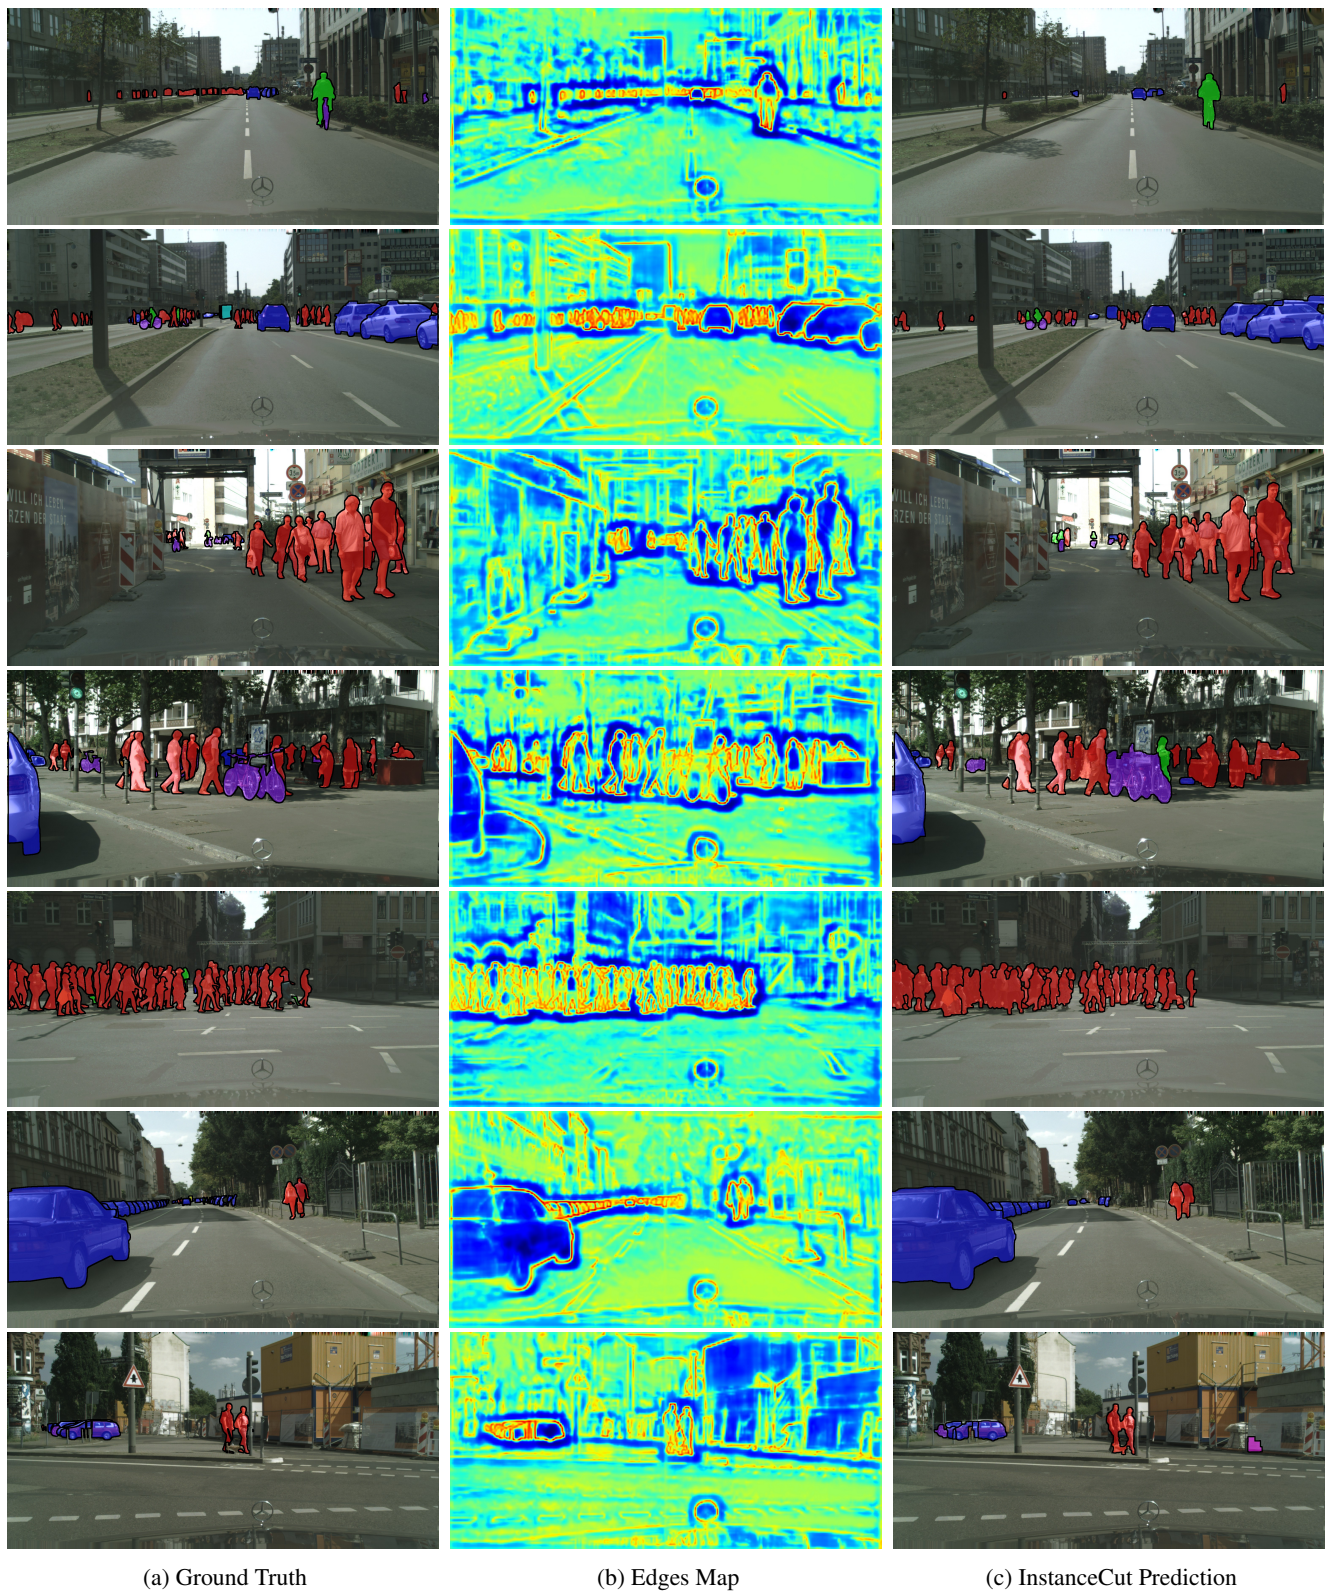

Figure 8: Failure cases. The left column contains input images with ground truth instances highlighted. The middle column depicts per-pixel instance-aware edge log-probabilities and the last column shows the results of our approach.
